# Supplementary material
Source: publisher figshare collection journal article supplement (https://karger.figshare.com/ndownloader/files/38310762)
Supplement: Supplementary file 1 [file 38310762]

Supplement Table II. Patients with hypoalbuminemia (<35 g/l), acidosis (standard bicarbonate <22 mmol/l) and inflammation (CRP >20 mg/l) alone or in combinations

|  | Total | | Prerenal | | Renal | | Postrenal | | AKI on CKD | | *p* |
| --- | --- | --- | --- | --- | --- | --- | --- | --- | --- | --- | --- |
|  | N | % | N | % | N | % | N | % | N | % |  |
| 0* | 78 | 6.4 | 47 | 8.5 | 6 | 5.0 | 6 | 5.8 | 19 | 4.3 | <0.001 |
| 1 | 258 | 21.3 | 112 | 20.4 | 27 | 22.5 | 18 | 17.3 | 101 | 23.1 | <0.001 |
| 2 | 494 | 40.8 | 241 | 43.8 | 47 | 39.2 | 40 | 38.5 | 166 | 38.0 | <0.001 |
| 3¶ | 381 | 31.5 | 150 | 27.3 | 40 | 33.3 | 40 | 38.5 | 151 | 34.6 | <0.001 |
| Total | 1211 | 100 | 550 | 100 | 120 | 100 | 104 | 100 | 437 | 100 |  |
|  |  | | <0.001 | | <0.001 | | <0.001 | | <0.001 | |  |

* Number of criteria fulfilled. 0=no hypoalbuminemia, no acidosis and no inflammation.

¶ All three criteria. Patients with both hypoalbuminemia, acidosis and inflammation
